# Supplementary material for: Efficient fractionation of pure hemicellulose with high DP from bleached hardwood pulp using LiBr·3H2O and co-production of dissolving pulp
Source: Royal Society of Chemistry journal article supplement (doi:10.1039/d4gc00335g), 2024-01-01
Supplement: d4gc00335g1.pdf [file d4gc00335g1.pdf]

## Supporting Information

# Efficient fractionation of pure hemicellulose with high DP from bleached hardwood pulp using LiBr·3H<sub>2</sub>O and co-production of dissolving pulp

Runzhu Gong<sup>1, 2</sup>, Chao Liu<sup>2</sup>, Meiyang Wu<sup>2</sup>, Rui Tian<sup>3</sup>, Guang Yu<sup>2</sup>, Xitao Luo<sup>2</sup>, Bin Li<sup>2, 4, 5, \*</sup>, Feng Peng<sup>3, \*</sup>, Yanjun Tang<sup>1, \*</sup>

<sup>1</sup> Key Laboratory of Intelligent Textile and Flexible Interconnection of Zhejiang Province, Zhejiang Sci-Tech University, Hangzhou 310018, China

<sup>2</sup> CAS Key Laboratory of Biobased Materials, System Integration Engineering Center, Qingdao Institute of Bioenergy and Bioprocess Technology, Chinese Academy of Sciences, Qingdao 266101, China

<sup>3</sup> College of Materials Science and Technology, Beijing Forestry University, Beijing 100083, China

<sup>4</sup> Shandong Energy Institute, Qingdao 266101, China

<sup>5</sup> Qingdao New Energy Shandong Laboratory, Qingdao 266101, China

Corresponding authors' E-mail addresses: [tangyj@zstu.edu.cn](mailto:tangyj@zstu.edu.cn) (Tang, Y.), [fengpeng@bjfu.edu.cn](mailto:fengpeng@bjfu.edu.cn) (Peng, F.), [libin@qibebt.ac.cn](mailto:libin@qibebt.ac.cn) (Li, B.).

Including Pages S1-S9, Characterization, Figure S1-S8, Table S1-S6

## Characterization

The  $\alpha$ -cellulose content of cellulose samples was characterized according to TAPPI test standard (T203 cm-99). The cellulose sample is extracted consecutively with 17.5% and 9.45% sodium hydroxide solutions at 25 °C. The  $\alpha$ -cellulose, which is insoluble, is derived by difference. The  $\alpha$ -cellulose content is determined by calculating the undissolved fraction, which is the difference between the total pulp specimen (100%) and the dissolved fraction (expressed as a percentage).

The degree of polymerization (DP) of cellulose samples was measured in accordance with international standard (ISO 5351/1). The freeze-dried cellulose samples were dissolved in 0.5 M Copper ethylene diamine (CED) at 20 °C for 30 min. Intrinsic viscosities of the solutions were obtained using capillary viscometer, and these values were converted to DP values by the Martin equation,  $DP^{0.905} = 0.75[\eta]$ .

All the measurements for each test were carried out at least three times, and the average results were reported.

**Table S1**

Effect of temperature and time of LBTH treatment on hemicellulose removal and yield.

| LBTH treatment conditions | Removal rate of hemicellulose (%) | Yield of hemicellulose (%) |
|---------------------------|-----------------------------------|----------------------------|
| 25 °C 1 h                 | 66.7±1.2                          | 54.2±1.1                   |
| 35 °C 1 h                 | 68.1±0.8                          | 60.2±0.7                   |
| 45 °C 1 h                 | 75.1±1.6                          | 69.9±0.2                   |
| 55 °C 1 h                 | 79.2±2.0                          | 73.1±2.0                   |
| 65 °C 1 h                 | 86.9±0.7                          | 75.9±1.6                   |
| 75 °C 1 h                 | 92.6±1.0                          | 80.3±1.7                   |
| 85 °C 1 h                 | 94.0±0.2                          | 82.4±3.2                   |
| 25 °C 5 h                 | 66.6±1.3                          | 62.5±1.3                   |
| 35 °C 5 h                 | 76.3±2.3                          | 69.4±2.3                   |
| 45 °C 5 h                 | 85.0±0.6                          | 75.3±2.4                   |
| 55 °C 5 h                 | 85.5±2.1                          | 82.2±1.8                   |
| 65 °C 5 h                 | 92.2±2.4                          | 82.0±2.7                   |
| 75 °C 5 h                 | 94.9±0.2                          | 83.5±2.2                   |
| 85 °C 5 h                 | 95.2±0.3                          | 84.3±2.9                   |

**Table S2**

Average molecular weights, *DP* and polydispersity index (*PDI*) (*Mw/Mn*) of soluble hemicellulose in ethanol filtrate.

| Treatment conditions | <i>Mw</i> (g/mol) | <i>Mn</i> (g/mol) | <i>PDI</i> | <i>DP</i> |
|----------------------|-------------------|-------------------|------------|-----------|
| LBTH (55 °C 5 h)     | 10060             | 6000              | 1.679      | 45        |

**Table S3**Saccharide components (mean  $\pm$  standard error) of regenerated hemicellulose.

| Treatment conditions | Glucose (%)   | Xylose (%)     | Arabinose (%) |
|----------------------|---------------|----------------|---------------|
| 25 °C 1 h            | 0.8 $\pm$ 0.2 | 94.2 $\pm$ 0.8 | 3.3 $\pm$ 0.7 |
| 35 °C 1 h            | 0.7 $\pm$ 0.3 | 94.7 $\pm$ 1.2 | 3.0 $\pm$ 1.3 |
| 45 °C 1 h            | 0.5 $\pm$ 0.3 | 93.5 $\pm$ 0.6 | 3.7 $\pm$ 0.8 |
| 55 °C 1 h            | 0.5 $\pm$ 0.1 | 96.5 $\pm$ 0.5 | 2.8 $\pm$ 0.7 |
| 65 °C 1 h            | 0.3 $\pm$ 0   | 95.3 $\pm$ 1.3 | 2.8 $\pm$ 0.7 |
| 75 °C 1 h            | 0.6 $\pm$ 0.2 | 95.0 $\pm$ 2.0 | 3.1 $\pm$ 0.7 |
| 85 °C 1 h            | 0.3 $\pm$ 0   | 97.2 $\pm$ 0.8 | 2.0 $\pm$ 0.6 |
| 25 °C 5 h            | 0.4 $\pm$ 0   | 97.3 $\pm$ 0.7 | 2.0 $\pm$ 0.3 |
| 35 °C 5 h            | 0.4 $\pm$ 0.1 | 96.5 $\pm$ 1.3 | 2.4 $\pm$ 0.3 |
| 45 °C 5 h            | 0.7 $\pm$ 0.3 | 95.3 $\pm$ 1.4 | 2.4 $\pm$ 0.3 |
| 55 °C 5 h            | 0.3 $\pm$ 0.1 | 96.9 $\pm$ 0.5 | 2.2 $\pm$ 0.3 |
| 65 °C 5 h            | 0.5 $\pm$ 0.4 | 94.5 $\pm$ 1.6 | 2.4 $\pm$ 1.9 |
| 75 °C 5 h            | 0.1 $\pm$ 0   | 98.6 $\pm$ 0.8 | 0.8 $\pm$ 0.1 |
| 85 °C 5 h            | 0.3 $\pm$ 0   | 97.9 $\pm$ 1.5 | 1.1 $\pm$ 0.1 |

**Table S4**Sugar composition,  $\alpha$ -cellulose content, ash content and degree of polymerization of the obtained dissolving pulp and BHKP.

| LBTH<br>Treatment<br>conditions | DP    | $\alpha$ -cellulose<br>% | Ash<br>% | Xylan<br>%     |
|---------------------------------|-------|--------------------------|----------|----------------|
| 25 °C 1 h                       | 800.3 | 97.0                     | 0.09     | 4.9 $\pm$ 2.0  |
| 35 °C 1 h                       | 817.9 | 97.3                     | 0.15     | 2.5 $\pm$ 1.0  |
| 45 °C 1 h                       | 878.0 | 95.8                     | 0.24     | 3.6 $\pm$ 0.5  |
| 55 °C 1 h                       | 880.7 | 96.8                     | 0.13     | 2.9 $\pm$ 0.8  |
| 65 °C 1 h                       | 875.8 | 97.2                     | 0.15     | 3.8 $\pm$ 0.7  |
| 75 °C 1 h                       | 809.1 | 98.1                     | 0.12     | 1.3 $\pm$ 0.6  |
| 85 °C 1 h                       | 789.4 | 96.5                     | 0.11     | 3.4 $\pm$ 0.7  |
| 25 °C 5 h                       | 801.2 | 97.4                     | 0.16     | 3.6 $\pm$ 1.4  |
| 35 °C 5 h                       | 864.8 | 95.2                     | 0.15     | 3.9 $\pm$ 2.0  |
| 45 °C 5 h                       | 844.2 | 96.9                     | 0.30     | 2.5 $\pm$ 0.5  |
| 55 °C 5 h                       | 901.7 | 97.2                     | 0.24     | 2.4 $\pm$ 1.1  |
| 65 °C 5 h                       | 916.4 | 97.4                     | 0.18     | 3.4 $\pm$ 0.3  |
| 75 °C 5 h                       | 850.5 | 97.2                     | 0.12     | 0.8 $\pm$ 0.6  |
| 85 °C 5 h                       | 794.6 | 96.4                     | 0.07     | 2.4 $\pm$ 1.0  |
| BHKP                            | 902.2 | -                        | -        | 16.7 $\pm$ 1.3 |

**Table S5**

The quality of the resulting pulp with the recycled LBTH under optimal conditions (55 °C, 5 h).

| Recycle times | DP    | $\alpha$ -cellulose<br>% | Ash<br>% | Xylan<br>% |
|---------------|-------|--------------------------|----------|------------|
| 0             | 901.7 | 97.2                     | 0.24     | 2.4±1.1    |
| 1             | 898.1 | 97.0                     | 0.3      | 2.5±0.7    |
| 2             | 903.5 | 96.8                     | 0.24     | 2.4±0.3    |
| 3             | 883.0 | 96.6                     | 0.26     | 2.1±1.3    |
| 4             | 894.2 | 96.6                     | 0.18     | 2.5±1.0    |
| 5             | 897.6 | 96.3                     | 0.24     | 2.3±1.1    |

**Table S6**

Comparison of the methods for fractionation of hemicellulose.

| Methods                                              | Treatment conditions | Removal rate of hemicellulose % | Yield of hemicellulose % | Methods of solvent recovery                             | Recovery rate of solvent % |
|------------------------------------------------------|----------------------|---------------------------------|--------------------------|---------------------------------------------------------|----------------------------|
| Phosphotungstic acid (PTA)-cold caustic <sup>1</sup> | 25°C /90°C<br>30 min | 79.2                            | NA                       | Filtration and evaporation                              | >86                        |
| Brønsted acidic DESs (BDESs) <sup>2</sup>            | 80°C 6 h             | NA                              | 36.3                     | Evaporation of anti-solvent                             | >90                        |
| $\gamma$ -valerolactone (GVL)/water <sup>3</sup>     | 135°C 2 h            | 93                              | NA                       | Evaporation /Conversion of the filtrate(glucose/xylose) | NA                         |
| Ionic liquid (EmimAc) /water <sup>4</sup>            | 60°C 2 h             | 61.2                            | NA                       | Evaporation of anti-solvent                             | NA                         |
| LBTH (this study)                                    | 55 °C 5 h            | 85.5                            | 82.2                     | Evaporation of anti-solvent                             | >90                        |

Note: a, calculated based on the composition of the obtained dissolving pulp; NA, not reported.

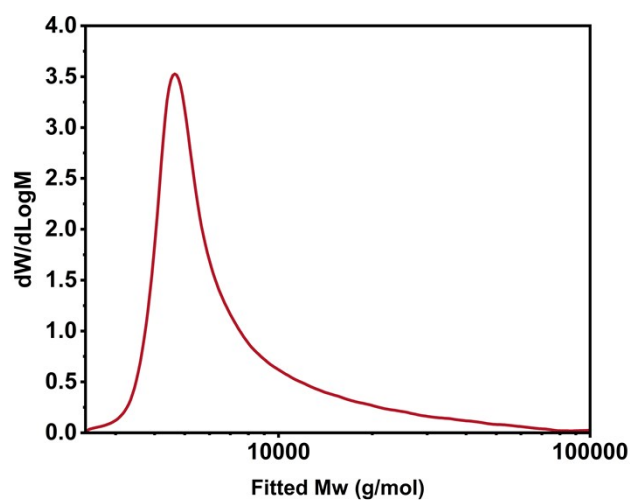

**Fig. S1** Molecular weight distribution of the collected soluble hemicellulose with the LBTH treatment condition of 55°C for 5 h.

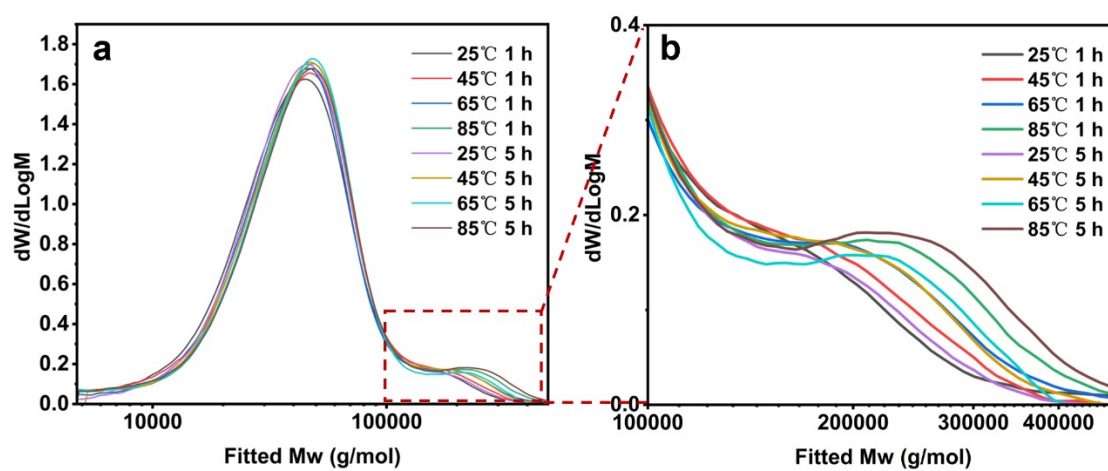

**Fig. S2** Molecular weight distribution diagram of regenerated hemicellulose.

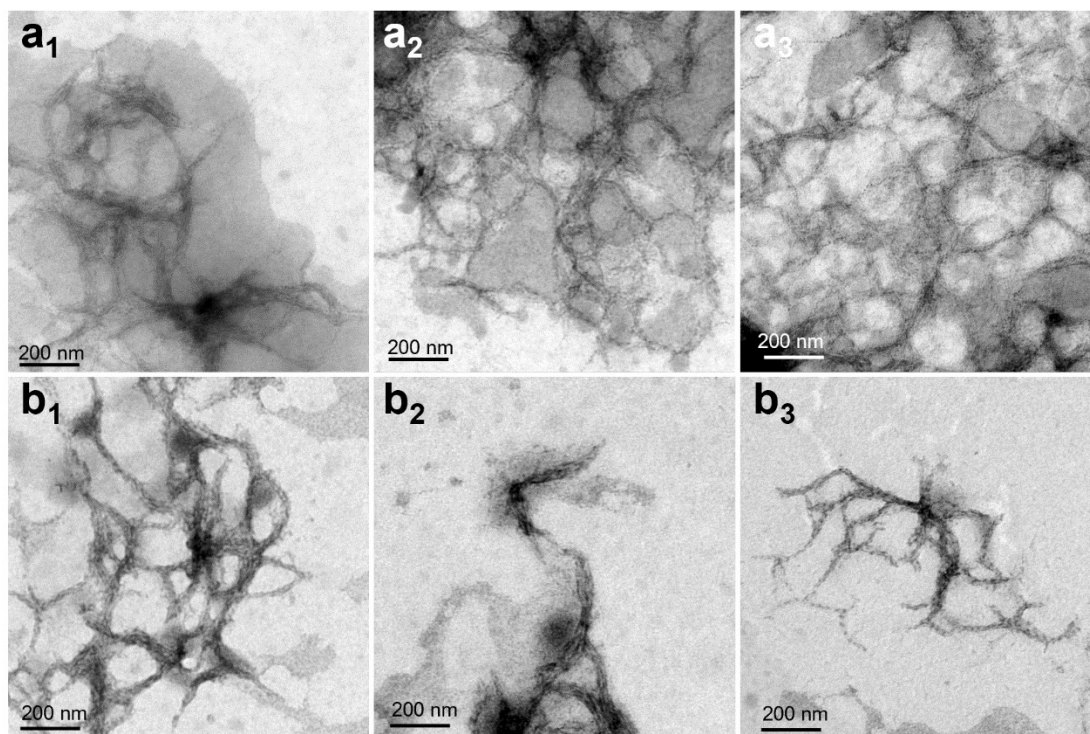

**Fig. S3** TEM photographs of regenerated hemicellulose treated in LBTH at 55 °C (a) and 75 °C (b) for 5 h, respectively.

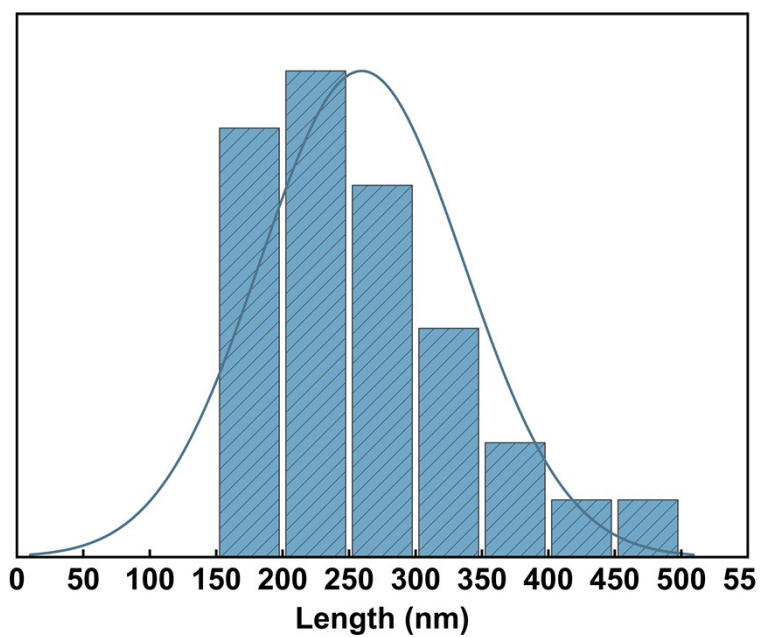

**Fig. S4** Length distribution of regenerated hemicellulose in TEM images.

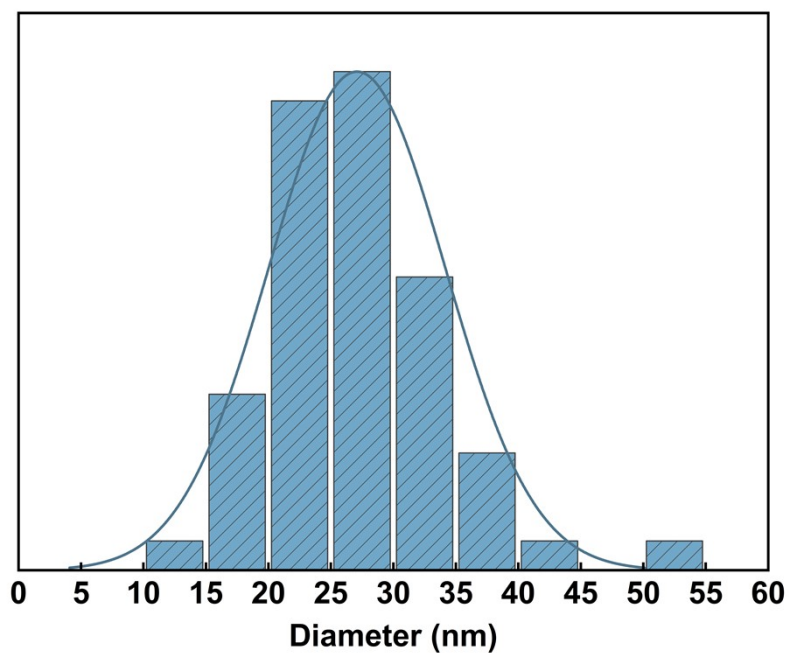

**Fig. S5** Diameter distribution of regenerated hemicellulose in TEM images.

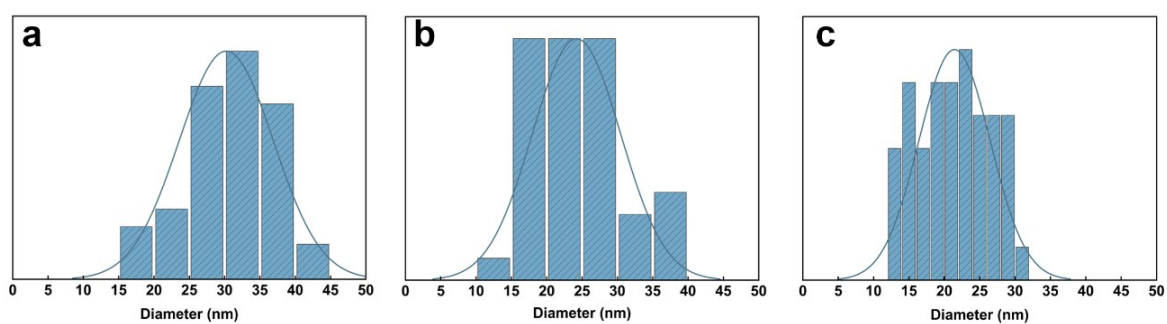

**Fig. S6** Diameter distribution of regenerated hemicellulose at different LBTH treatment temperatures (25 °C (a), 55 °C (b), 85 °C (c)) in SEM.



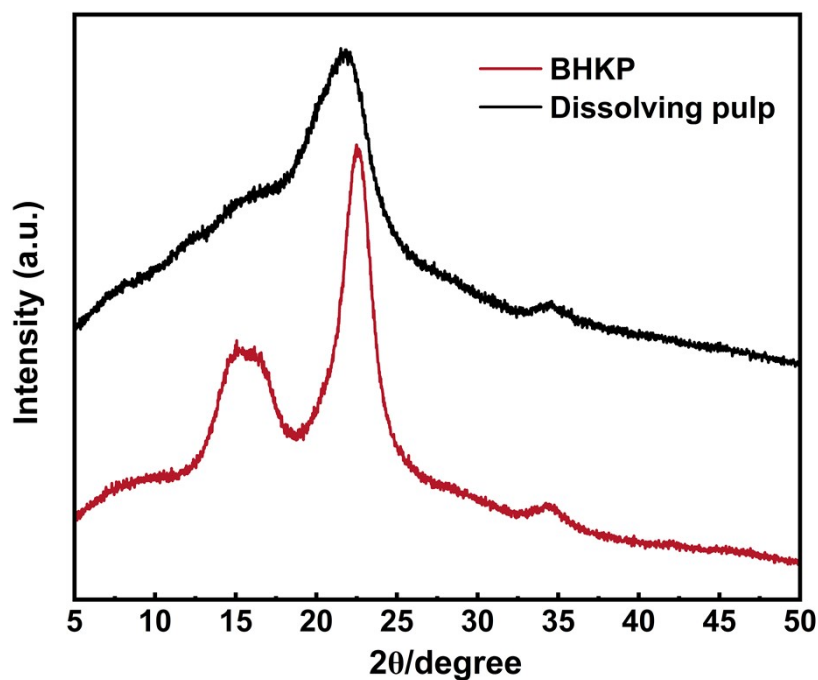

**Fig. S7** XRD patterns of BHKP before and after LBTH treatment.

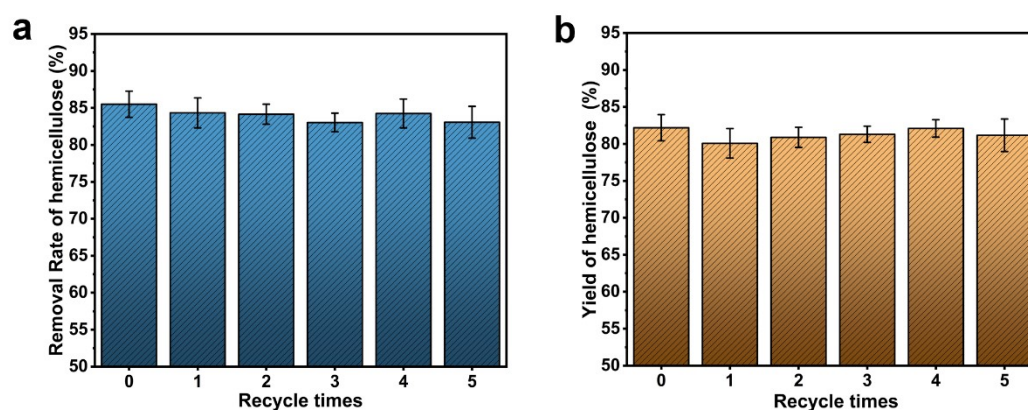

**Fig. S8** Removal rates (a) and yields (b) of hemicelluloses with the recycled LBTH under optimal conditions (55 °C, 5 h).

Reference:

1. X. Wang, C. Duan, X. Feng, X. Qin, W. Wang, J. Wang, Y. Xu and Y. Ni, *Separation and Purification Technology*, 2021, **266**, 118562.
2. J. Yang, W. Zhang, Y. Wang, M. Li, F. Peng and J. Bian, *Carbohydr Polym*, 2022, **278**, 118992.
3. B. Yang, S. Zhang, H. Hu, C. Duan, Z. He and Y. Ni, *Separation and Purification Technology*, 2020, **248**, 117071.
4. B. Yang, X. Qin, H. Hu, C. Duan, Z. He and Y. Ni, *Cellulose*, 2020, **27**, 9653-9661.
